# Supplementary material for: Pollutants Analysis and Life Cycle Assessment of a Photovoltaic Powered Textile Electro-Fenton Wastewater Treatment System
Source: PubMed Central journal article supplement — ACS Omega. 2024 Sep 17;9(39):40477–84. doi: 10.1021/acsomega.4c03397 (PMC11447860; doi:10.1021/acsomega.4c03397), 2024-09-17
Supplement: ao4c03397_si_001.pdf [file ao4c03397_si_001.pdf]

# **Pollutants Analysis and Life Cycle Assessment of a Photovoltaic Powered Textile Electro-Fenton Wastewater Treatment System**

Chenyang Zhang<sup>1</sup>, Wei Zhang<sup>1\*</sup>, Xiding Zeng<sup>1</sup>, Jiahong Guo<sup>1</sup>, Qing Wang<sup>1</sup>, Zepu Bai<sup>1</sup>

1. College of Architecture and Environment, Sichuan University, Chengdu, China; 610065

\*Corresponding Author: A/Prof. Wei Zhang, Email: zhangwei821@scu.edu.cn

## S1: Experimental instruments for the EF system

**Table S1.** The equipment and parameters

| Equipment          | Function             | Accuracy/Sensitivity                   |
|--------------------|----------------------|----------------------------------------|
| Current controller | Control current      | 0-1 A                                  |
| Magnetic stirrer   | Stir up the sewage   | 10W                                    |
| Battery            | Stored electricity   | 40Ah                                   |
| Air pump           | Provide reaction     | 0-1 L/min                              |
| Spectrophotometer  | Removal rate testing | Wavelength range 325~1000 nm $\pm$ 2nm |
| PV panel           | Generate electricity | 500X500X25(mm)                         |

## S2: Experimental materials for the EF system

**Table S2.** The materials and parameters

| Material                                      | Function                       | Original concentration/Dimension |
|-----------------------------------------------|--------------------------------|----------------------------------|
| Nickel foam                                   | Cathode                        | 40X20(mm)                        |
| Graphite                                      | Anode                          | 40X20(mm)                        |
| Acid orange 7                                 | Raw material for degradation   | 4g/L                             |
| Methylene blue                                | Raw material for degradation   | 4g/L                             |
| Malachite green                               | Raw material for degradation   | 4g/L                             |
| FeSO <sub>4</sub>                             | Catalyze the reaction          | 4mmol/L                          |
| Na <sub>2</sub> SO <sub>4</sub>               | Increase solution conductivity | 100mmol/L                        |
| Na <sub>2</sub> S <sub>2</sub> O <sub>3</sub> | Stop the reaction              | 100mmol/L                        |

### S3: Relevant parameters of the PV model

**Table S3.** The parameters of the PV model

| Parameters                                       |      |
|--------------------------------------------------|------|
| Short circuit current, $I_{sc}$ (A)              | 2.69 |
| Current at the maximum power point, $I_{mp}$ (A) | 2.93 |
| Open circuit voltage, $V_{oc}$ (V)               | 21.7 |
| Voltage at the maximum power point, $V_{mp}$ (V) | 18   |
| Absorptivity (%)                                 | 90   |

#### S4: Life cycle inventory

**Table S4.** The main production raw material parameters of the system equipment in a textile factory

| Component          | Quantity (kg) | Material                       | Amount(kg) |
|--------------------|---------------|--------------------------------|------------|
| PV Panels          | 280.80        | Si                             | 36.20      |
|                    |               | Al                             | 86.20      |
|                    |               | Glass                          | 89.60      |
|                    |               | EVA                            | 19.00      |
|                    |               | TPT                            | 9.80       |
| Battery            | 300.00        | Pb                             | 30.00      |
|                    |               | H <sub>2</sub> SO <sub>4</sub> | 5.20       |
|                    |               | ABS                            | 3.20       |
|                    |               | Ca                             | 0.01       |
|                    |               | Sn                             | 0.09       |
| Inverter           | 4.86          | PCB                            | 40.00      |
| Current Controller | 4.00          | PCB                            | 8.00       |
|                    |               | FD-309                         | 0.16       |
| Air pump           | 10.00         | Steel                          | 0.05       |
| Magnetic stirrer   | 25.00         | Ti                             | 3.40       |
|                    |               | Steel                          | 0.90       |
| Cathode            | 0.16          | TP270                          | 0.16       |
| Anode              | 0.05          | Powdered Licorice              | 0.15       |
